# Supplementary material for: Surface phosphorylation of chitosan significantly improves osteoblastcell viability, attachment and proliferation
Source: Royal Society of Chemistry journal article supplement (doi:10.1039/b911854c), 2009-11-19
Supplement: b911854c.pdf [file b911854c.pdf]

## Support information

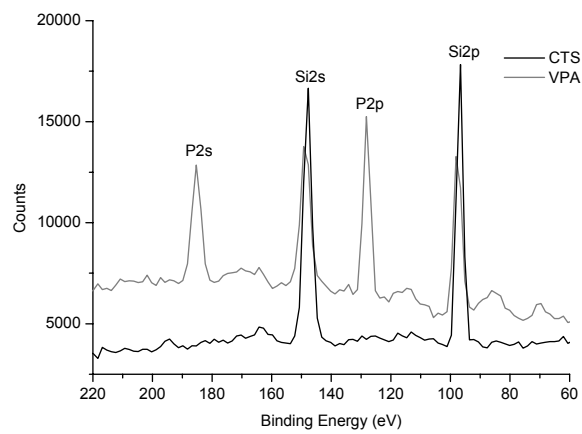

**Fig. S1.** XPS Survey spectra of non-treated and PVPA grafted materials.

**Table S1.** Chemical composition in atomic percentage of native and PVPA grafted chitosan membranes determined by XPS

| <b>Material</b> | <b>C<sub>1s</sub> (at%)</b> | <b>O<sub>1s</sub> (at%)</b> | <b>N<sub>1s</sub> (at%)</b> | <b>Si<sub>1s</sub> (at%)</b> | <b>P<sub>2p</sub> (at%)</b> |
|-----------------|-----------------------------|-----------------------------|-----------------------------|------------------------------|-----------------------------|
| <b>CTS</b>      | 63.2                        | 27.3                        | 5.1                         | 4.3                          | 0.0                         |
| <b>PVPA</b>     | 56.5                        | 32.1                        | 6.8                         | 2.6                          | 2.0                         |

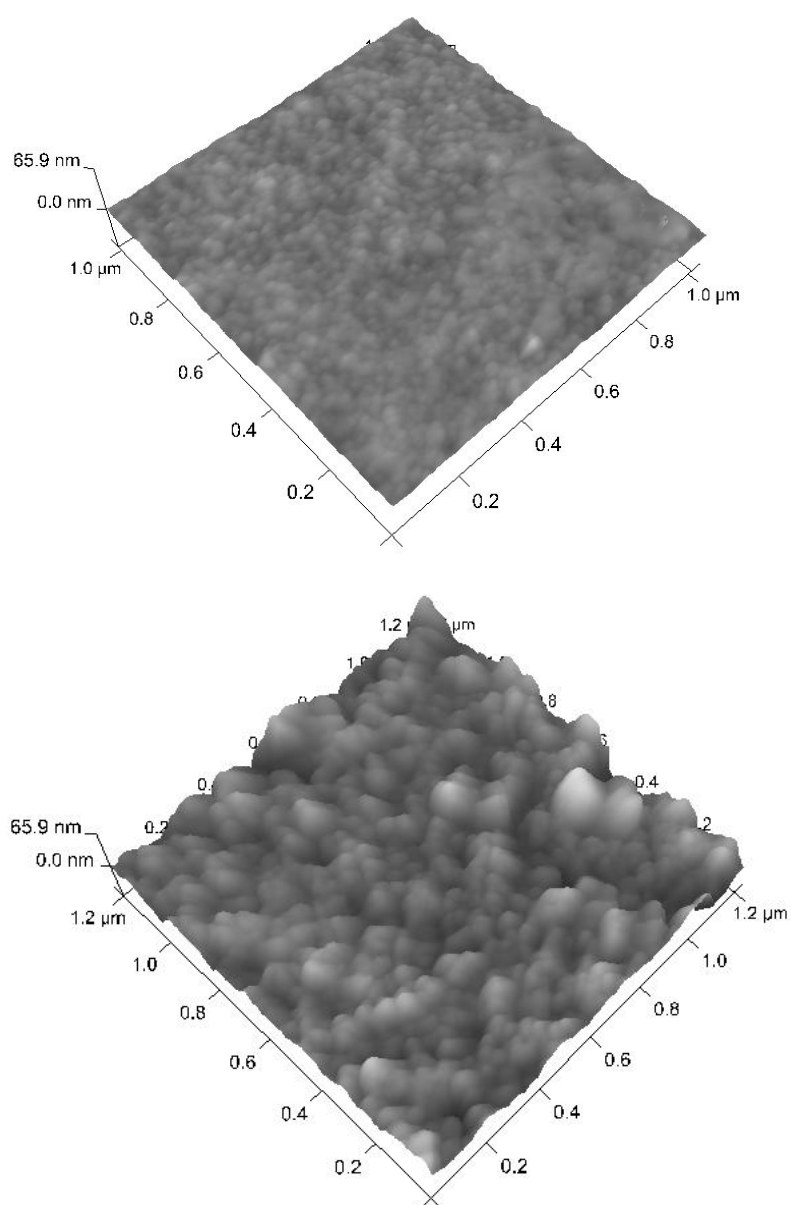

Fig. S2. AFM images of chitosan (top) and PVPA grafted (bottom) membranes.
